# Supplementary material
Source: publisher site journal article supplement (https://www.dovepress.com/article/190752)
Supplement: Supplementary file 1 [file get_supplementary_file.php]

1 **Supporting Information**

2 **Estrogen receptor inhibition enhances cold-induced adipocyte beiging and**  
3 **glucose tolerance**

4 Kfir Lapid<sup>1,2,\*</sup>, Ajin Lim<sup>1</sup>, Eric D. Berglund<sup>3,4</sup> and Yue Lu<sup>2</sup>

5 <sup>1</sup>Department of Developmental Biology

6 <sup>2</sup>Division of Endocrinology, Department of Internal Medicine

7 <sup>3</sup>Advanced Imaging Research Center

8 <sup>4</sup>Department of Pharmacology

9 University of Texas Southwestern Medical Center, Dallas

10 5323 Harry Hines Boulevard

11 Dallas, TX 75390-9133 USA

12 Telephone: 214-648-6804, Fax: 214-648-8917

13 \*Corresponding Author: [Kfir.Lapid@utsouthwestern.edu](mailto:Kfir.Lapid@utsouthwestern.edu)

14

15 ORCID ID: Kfir Lapid - 0000-0002-8898-8695

16

17

18

19

## 20 **Supporting Figure Legends**

21 **Figure S1. Related to Figure 1.** Four-month-old female ER $\alpha$ WT (WT) and ER $\alpha$ KO (KO) mice  
22 were subjected to cold-exposure (6°C) for 7 days or maintained at RT (23°C). (A) Representative  
23 photographs of inguinal (IGW) and perigonadal (PGW) white adipose depots of WT and KO  
24 females. (B) Weight of indicated fat depots in WT and KO females: SWAT - IGW and  
25 intrascapular (ISCW); VWAT - PGW, retroperitoneal (RPW) and mesenteric (MWAT); and  
26 intrascapular BAT, n $\geq$ 8. (C) Food intake was measured by weighing crude normal chow per mouse  
27 per cage, n $\geq$ 8. (D) Lean mass by NMR, n $\geq$ 8. (E) Weight of indicated organs in WT and KO  
28 females, n $\geq$ 7. (F) Serum cholesterol and triglyceride levels of WT and KO females, n $\geq$ 4. (G)  
29 Insulin tolerance tests were performed in WT and KO females at RT (a week prior to cold-  
30 exposure) and immediately after cold-exposure. Mice were fasted, i.p. injected with 0.3mU/g  
31 insulin, and their glucose levels were monitored, n $\geq$ 8. Inset – areas under curve. (H) Serum insulin  
32 levels of WT and KO females, n $\geq$ 5. Error bars indicate S.E.M. Statistical significance assessed by  
33 two-tailed student's t-test, \* p < 0.05, \*\* p < 0.01; and one-way ANOVA test, \$ p < 0.01.

34 **Figure S2. Related to Figure 1.** Four-month-old female ER $\alpha$ WT (WT) and ER $\alpha$ KO (KO) mice  
35 were subjected to cold-exposure (6°C) for 7 days or maintained at RT (23°C). (A) Representative  
36 H&E-stained histological sections of VWAT, n $\geq$ 8. (B) UCP1 immunohistochemistry -  
37 representative sections of SWAT. (C) Relative mRNA levels, quantified by qPCR, of brown/beige  
38 adipocyte markers expressed in VWAT (PGW) of WT and KO females at cold, n $\geq$ 6. (D) Relative  
39 mRNA levels, quantified by qPCR, of UCP1 in SWAT (IGW) of WT and KO females at RT and  
40 cold, n $\geq$ 5. (E) Body temperature (rectal probe) of WT and KO females at RT and cold, n $\geq$ 9. Scale  
41 bars = 100  $\mu$ m. Error bars indicate S.E.M. Statistical significance assessed by two-tailed student's  
42 t-test, \* p < 0.05, \*\* p < 0.01; and one-way ANOVA test, \$ p < 0.01.

43 **Figure S3. Related to Figure 2.** Two-month-old female mice underwent sham operation or  
44 ovariectomy (OVX), 3 months later, both groups were either subjected to cold-exposure (6°C) for  
45 7 days or maintained at RT (23°C). **(A)** Representative photographs of IGW and PGW adipose  
46 depots of Sham and OVX females. **(B)** Weight of indicated fat depots in Sham and OVX females:  
47 SWAT - IGW and ISCW; VWAT - PGW, RPW and MWAT; and intrascapular BAT, n≥8. **(C)**  
48 Food intake was measured by weighing crude normal chow per mouse per cage, n≥6. **(D)** Liver  
49 weights of Sham and OVX females, n≥8. **(E)** Lean mass by NMR, n≥6. **(F)** Weight of indicated  
50 organs in Sham and OVX females, n≥8. **(G)** Serum cholesterol and triglyceride levels of Sham  
51 and OVX females, n≥8. **(H)** Insulin tolerance tests were performed in 6-month-old Sham and OVX  
52 females at RT (a week prior to cold-exposure) and immediately after cold-exposure. Mice were  
53 fasted, i.p. injected with 0.75mU/g insulin, and their glucose levels were monitored, n≥10. Inset –  
54 areas under curve. **(I)** Serum insulin levels of Sham and OVX females, n≥5. Error bars indicate  
55 S.E.M. Statistical significance assessed by two-tailed student's t-test, \* p < 0.05, \*\* p < 0.01, NS  
56 – not significant; and one-way ANOVA test, \$ p < 0.01.

57 **Figure S4. Related to Figure 2.** Two-month-old female mice underwent sham operation or  
58 ovariectomy (OVX), 3 months later, both groups were either subjected to cold-exposure (6°C) for  
59 7 days or maintained at RT (23°C). **(A-B)** Representative H&E-stained histological sections of  
60 VWAT (A) and BAT (B), n≥8. **(C)** UCP1 immunohistochemistry - representative sections of  
61 SWAT. **(D)** Relative mRNA levels, quantified by qPCR, of brown/beige adipocyte markers  
62 expressed in VWAT (PGW) at cold, n≥10. **(E)** Relative mRNA levels, quantified by qPCR, of  
63 UCP1 in SWAT (IGW) of Sham and OVX females at RT and cold, n≥7. **(F)** Body temperature  
64 (rectal probe) of Sham and OVX females at RT and cold, n≥11. **(G)** Triglyceride levels in the  
65 livers of Sham and OVX females at RT and cold, n≥8. Scale bars = 100 μm. Error bars indicate

66 S.E.M. Statistical significance assessed by two-tailed student's t-test, \*  $p < 0.05$ , \*\*  $p < 0.01$ , NS  
67 – not significant; and one-way ANOVA test, \$  $p < 0.01$ .

68 **Figure S5. Related to Figure 3. (A-D)** SV cells were isolated from SWAT of two-month-old  
69 females. **(A-B)** Confluent cells were induced with white adipogenic media in the presence of  
70 vehicle or Fulvestrant. A week later, cells were stained with Oil Red O (A) or immunostained for  
71 UCP1 (B). Nile Red stains lipid droplets. **(C-D)** Confluent cells were induced with beige  
72 adipogenic media in the presence of vehicles, Estradiol and/or Fulvestrant. A week later, beige  
73 cells were activated with Forskolin. Beiging was assessed by relative mRNA levels, quantified by  
74 qPCR, of brown/beige adipocyte markers,  $n \geq 6$  (C) or by UCP1 immunostaining (D). Nile Red  
75 stains lipid droplets. **(E-H)** Acute administration: Four-month-old WT females were given a  
76 vehicle or 40 mg/kg/injection Fulvestrant as described in Figure 3D, then they were subjected to  
77 cold-exposure ( $6^{\circ}\text{C}$ ) for 7 days or maintained at RT ( $23^{\circ}\text{C}$ ). **(E)** Body weight,  $n \geq 7$ . **(F)** Weight of  
78 indicated fat depots in vehicle-treated and Fulvestrant-treated females: SWAT - IGW and ISCW;  
79 VWAT - PGW, RPW and MWAT; and intrascapular BAT,  $n \geq 7$ . **(G)** Food intake was measured  
80 by weighing crude normal chow per mouse per cage,  $n \geq 6$ . **(H)** Representative H&E-stained  
81 histological sections of SWAT,  $n \geq 7$ . Scale bars = 100  $\mu\text{m}$ . Error bars indicate S.E.M. Statistical  
82 significance assessed by two-tailed student's t-test, \*  $p < 0.05$ , \*\*  $p < 0.01$ ; and one-way ANOVA  
83 test, \$  $p < 0.01$ .

84 **Figure S6. Related to Figure 4.** Chronic administration: Four-month-old WT ICR(CD1) females  
85 were given a vehicle or 40 mg/kg/injection Fulvestrant for a month as described in Figure 4A, then  
86 they were subjected to cold-exposure ( $6^{\circ}\text{C}$ ) for 7 days or maintained at RT ( $23^{\circ}\text{C}$ ). **(A-C)** ER $\alpha$   
87 immunofluorescence of vehicle-treated and Fulvestrant-treated females at RT (prior to cold-  
88 exposure) - representative sections of SWAT (A), VWAT (B) and BAT (C). Negative controls

89 (lower lane) – representative sections from ER $\alpha$ KO females that lack ER $\alpha$  expression. **(D-G)** Body  
90 weight (D), fat mass by NMR (E), fat content by NMR (F) and lean mass by NMR (G) were  
91 monitored during vehicle and Fulvestrant administration and following cold-exposure,  $n \geq 11$ . **(H)**  
92 Food intake was measured by weighing crude normal chow per mouse per cage,  $n \geq 11$ . **(I)** Weight  
93 of indicated organs in vehicle-treated and Fulvestrant-treated females,  $n \geq 6$ . Scale bars = 100  $\mu$ m.  
94 Error bars indicate S.E.M. Statistical significance assessed by two-tailed student's t-test, \*  $p <$   
95 0.05, \*\*  $p < 0.01$ ; and one-way ANOVA test, \$  $p < 0.01$ . (Fulvestrant only) – statistically  
96 significant only in Fulvestrant-treated mice.

97 **Figure S7. Related to Figure 5.** Chronic administration: Four-month-old WT ICR(CD1) females  
98 were given a vehicle or 40 mg/kg/injection Fulvestrant for a month as described in Figure 4A, then  
99 they were subjected to cold-exposure (6°C) for 7 days or maintained at RT (23°C). **(A)** Relative  
100 mRNA levels, quantified by qPCR, of UCP1 in SWAT (IGW) of vehicle-treated and Fulvestrant-  
101 treated females at RT and cold,  $n \geq 6$ . **(B)** The body temperatures (rectal probe) of vehicle-treated  
102 and Fulvestrant-treated females were monitored upon cold-exposure,  $n \geq 12$ . Error bars indicate  
103 S.E.M. Statistical significance assessed by two-tailed student's t-test, \*  $p < 0.05$ , \*\*  $p < 0.01$ ; and  
104 one-way ANOVA test, \$  $p < 0.01$ .

105 **Figure S8. Related to Figure 6.** **(A-L)** Chronic administration in a high-fat diet (HFD) model: At  
106 the age of two-month-old onwards, WT female mice were fed with high-fat high-sucrose diet. Two  
107 months later, the females were given a vehicle or 40 mg/kg/injection Fulvestrant for a month as  
108 described in Figure 6A, then they were subjected to cold-exposure (6°C) for 7 days or maintained  
109 at RT (23°C). **(A)** Body weight was monitored from the onset of HFD, during vehicle and  
110 Fulvestrant administration and following cold-exposure,  $n \geq 21$ . **(B)** Fat content by NMR,  $n \geq 17$ .  
111 **(C)** Lean mass by NMR,  $n \geq 17$ . **(D)** Representative photographs of IGW adipose depots of vehicle-

112 treated and Fulvestrant-treated females on HFD at RT and cold. **(E)** Weight of indicated fat depots  
113 in vehicle-treated and Fulvestrant-treated females on HFD: SWAT - IGW and ISCW; VWAT -  
114 PGW, RPW and MWAT; and intrascapular BAT,  $n \geq 7$ . **(F)** Liver weights of vehicle-treated and  
115 Fulvestrant-treated females on HFD,  $n \geq 7$ . **(G)** Serum cholesterol and triglyceride levels of vehicle-  
116 treated and Fulvestrant-treated females on HFD,  $n \geq 7$ . **(H)** Serum insulin levels of vehicle-treated  
117 and Fulvestrant-treated females on HFD,  $n \geq 7$ . **(I)** Representative histological sections of SWAT -  
118 H&E-stained at RT (upper lane),  $n \geq 7$ , and UCP1 immunofluorescence at cold (lower lane). **(J)**  
119 Relative mRNA levels, quantified by qPCR, of UCP1 in SWAT (IGW) and BAT of vehicle-treated  
120 and Fulvestrant-treated females on HFD at RT and cold,  $n \geq 7$ . **(K)** The body temperatures (rectal  
121 probe) of vehicle-treated and Fulvestrant-treated females on HFD were monitored upon cold-  
122 exposure,  $n \geq 7$ . **(L)** Triglyceride levels in the livers of vehicle-treated and Fulvestrant-treated  
123 females on HFD at RT and cold,  $n \geq 7$ . Scale bars = 100  $\mu$ m. Error bars indicate S.E.M. Statistical  
124 significance assessed by two-tailed student's t-test, \*  $p < 0.05$ , \*\*  $p < 0.01$ , NS – not significant;  
125 and one-way ANOVA test, \$  $p < 0.01$ . Beige cells - Confluent cells were induced with beige  
126 adipogenic media in the presence of vehicle or Fulvestrant for a week.

127 **Figure S9. Related to Figure 7.** **(A-E)** SV cells were isolated from SWAT of two-month-old WT  
128 females. Confluent cells were treated daily with a vehicle or Fulvestrant for 8-48hr, in the absence  
129 of beige adipogenic reagents – termed undifferentiated cells. **(A)** Relative changes in cAMP  
130 concentrations in undifferentiated cells upon induction with or without Forskolin. Every dot  
131 represents an average of technical triplicates of one biological sample. The relative changes in  
132 cAMP concentrations are calculated as differences between treatments,  $n \geq 7$ . **(B)** Relative mRNA  
133 levels, quantified by qPCR, of UCP1,  $\beta$ -adrenergic receptors,  $\beta$ -adrenergic receptor kinases and  
134 PPAR $\gamma$ 2,  $n \geq 5$ . **(C, E)** Vehicle-treated or Fulvestrant-treated undifferentiated cells were

135 immunostained for AdR $\beta$ 3 (C) or PCNA (E) expression. Arrows indicate PCNA<sup>+</sup> cells and the  
136 numbers represent their percentage. **(D)** Relative mRNA levels, quantified by qPCR, of UCP1 and  
137 AdR $\beta$ 3 in undifferentiated cells (taken from Fig. S9B) and beige cells (taken from Fig. 7B), n $\geq$ 5.  
138 **(F)** Confluent cells were treated daily with a vehicle or Fulvestrant for 48hr, and then induced with  
139 beige adipogenic media in the presence of  $\beta$ 3 agonist without Fulvestrant. Beiging was assessed  
140 by UCP1 immunostaining. Nile Red stains lipid droplets. **(G-H)** Vehicle-treated and Fulvestrant-  
141 treated females (G, see Figure 3) as well as ER $\alpha$ WT (WT) and ER $\alpha$ KO (KO) females (H, see  
142 Figure 1) were subjected to cold-exposure (6°C) for 7 days or maintained at RT (23°C).  
143 Representative histological sections of SWAT, which were immunostained for AdR $\beta$ 3 and  
144 Perilipin. **(I)** Relative mRNA levels, quantified by qPCR, of AdR $\beta$ 3 and AdR $\beta$ K2 in SWAT of  
145 vehicle-treated and Fulvestrant-treated females, n $\geq$ 6. **(J-K)** Four-month-old WT females were pre-  
146 treated with a vehicle or 40 mg/kg/injection Fulvestrant, followed by administration of 1  
147 mg/kg/day  $\beta$ 3 agonist as described in Figure 7G. Relative mRNA levels, quantified by qPCR, of  
148 brown/beige adipocyte markers expressed in SWAT (IGW) (J), and BAT (K), n $\geq$ 7. Scale bars =  
149 100  $\mu$ m. Error bars indicate S.E.M. Statistical significance assessed by two-tailed student's t-test,  
150 \* p < 0.05, \*\* p < 0.01; and one-way ANOVA test, \$ p < 0.01. In (a), results are based on a matched  
151 standard curve and a linear regression analysis.

152 **Figure S10. Summary.** **(A)** In this study, we studied mouse models of inhibited ER $\alpha$  signaling:  
153 1) a genetic approach - whole-body ER $\alpha$ KO mice; 2) a surgical approach - OVX females; 3) a  
154 pharmacological approach - treatment with the estrogen receptor antagonist – Fulvestrant, and  
155 exposed them to cold. Upon cold-exposure, we detected adipocyte beiging in control mice (e.g.  
156 WT, Sham or vehicle-treated) as expected, however, mouse models of inhibited ER $\alpha$  showed an  
157 enhanced response. This response included increased emergence of multilocular beige cells and

158 elevated gene expression of beige/brown adipocyte markers in WAT and BAT. By using a primary  
159 beige cell culture, we demonstrated that this enhanced beiging is cell-autonomous. **(B)** Although  
160 under normal circumstances of room temperature, ER $\alpha$ KO, OVX and mice on HFD are obese and  
161 diabetic, cold-exposure resulted in significantly improved metabolism. As a result of cold-  
162 exposure, we observed: reduced adiposity and hyperglycemia, increased glucose and insulin  
163 tolerance, and corrected diabetes-associated hypercholesterolemia, hypertriglyceridemia and  
164 hepatosteatosis. **(C)** Hypothesis – estrogen receptor inhibition enhances adipocyte beiging by  
165 “sensitizing” the cells to the beiging process upon stimulation. Stimuli of beiging may be elicited  
166 by cold-exposure or adrenergic signals. Our preliminary results support such a hypothesis –  
167 Fulvestrant pre-treatment increased cAMP levels and AdR $\beta$ 3 expression in both immature and  
168 mature cells. This allowed increased beige cell differentiation or activation via AdR $\beta$ 3. The  
169 mechanism that underlies enhanced cold-induced adipocyte beiging following ER $\alpha$  inhibition is  
170 yet to be elucidated.

171

172

173

174

175

176

177

178



179 **Table S1. qPCR primer sequences.**

| <b>Gene</b> | <b>Forward primer sequence</b> | <b>Reverse primer sequence</b> |
|-------------|--------------------------------|--------------------------------|
| Acot2       | ATGGTGGCCTCGTCTTTCG            | GAGCGGCGGAGGTACAAAC            |
| Adrβ1       | CTCGTCCGTCGTCTCCTTCTAC         | GTCGATCTTCTTTACCTGTTTTTGG      |
| Adrβ2       | TTGCAGTGGATCGCTATGTTG          | TGACCACTCGGGCCTTATTCT          |
| Adrβ3       | GGCCCTCTCTAGTTCCAG             | TAGCCATCAAACCTGTTGAGC          |
| Adrβk1      | AGCGAGTACCCAAGATGAAGAACA       | CACTGCCACGCTGGATCA             |
| Adrβk2      | GGACAGAAGTCGTTACAGCTAATTCA     | ACTCCAAGCTGCTGTCAAA            |
| Cidea       | TGCTCTTCTGTATCGCCCAGT          | GCCGTGTTAAGGAATCTGCTG          |
| Cox7a1      | CAGCGTCATGGTCAGTCTGT           | AGAAAACCGTGTGGCAGAGA           |
| β-Actin     | GCGCATCCTCTTCCT                | GGAGCAATGATCTTGATC             |
| Eval        | CCACTTCTCCTGAGTTTACAGC         | GCATTTTAACCGAACATCTGTCC        |
| Oplah       | CTTCACGCACGTCTCCTTGT           | GCATCTGCACAGGCCGTAT            |
| PGC1α       | AGCCGTGACCACTGACAACGAG         | GCTGCATGGTTCTGAGTGCTAAG        |
| PPARγ2      | ACAGCAAATCTCTGTTTATGC          | GCTTGATGTCAAAGGAATGCG          |
| PRDM16      | CAGCACGGTGAAGCCATTC            | GCGTGCATCCGCTTGTG              |
| Slc29a1     | CACCAGCCTCAGGACAGGTAT          | GTCCAGGCGGTTTGTGAAA            |
| UCP1        | ACTGCCACACCTCCAGTCATT          | CTTTGCCTCACTCAGGATTGG          |

180  
181  
182  
183  
184  
185  
186  
187  
188  
189  
190  
191  
192

193 **Table S2. Unilocularity Index.**

|                                             |                                          |                                              |
|---------------------------------------------|------------------------------------------|----------------------------------------------|
| <b>Cold-exposed:</b>                        | <b>ER<math>\alpha</math>WT females</b>   | <b>ER<math>\alpha</math>KO females</b>       |
| SWAT (Fig. 1G)                              | 0.5418 $\pm$ 0.022                       | 0.4047 $\pm$ 0.0255 **                       |
| VWAT (Fig. S2A)                             | 0.6684 $\pm$ 0.0202                      | 0.6063 $\pm$ 0.0373 <sup>NS</sup>            |
| <b>Cold-exposed:</b>                        | <b>Sham females</b>                      | <b>OVX females</b>                           |
| SWAT (Fig. 2G)                              | 0.5528 $\pm$ 0.0194                      | 0.401 $\pm$ 0.0368 *                         |
| VWAT (Fig. S4A)                             | 0.6726 $\pm$ 0.0196                      | 0.6281 $\pm$ 0.0336 <sup>NS</sup>            |
| <b>Cold-exposed:</b>                        | <b>Vehicle-treated females (acute)</b>   | <b>Fulvestrant-treated females (acute)</b>   |
| SWAT (Fig. 3G)                              | 0.474 $\pm$ 0.0188                       | 0.3573 $\pm$ 0.0297 *                        |
| VWAT (Fig. S5F)                             | 0.6756 $\pm$ 0.0186                      | 0.6342 $\pm$ 0.0197 <sup>NS</sup>            |
| <b>Cold-exposed:</b>                        | <b>Vehicle-treated females (chronic)</b> | <b>Fulvestrant-treated females (chronic)</b> |
| SWAT (Fig. 5A)                              | 0.4966 $\pm$ 0.0199                      | 0.3378 $\pm$ 0.0205 ***                      |
| VWAT (Fig. 5B)                              | 0.6746 $\pm$ 0.0239                      | 0.4338 $\pm$ 0.0218 ***                      |
| <b>Cold-exposed:</b>                        | <b>Vehicle-treated females (HFD)</b>     | <b>Fulvestrant-treated females (HFD)</b>     |
| SWAT (Fig. S8I)                             | 0.6828 $\pm$ 0.0171                      | 0.6444 $\pm$ 0.0273 <sup>NS</sup>            |
| <b><math>\beta</math>3 agonist-treated:</b> | <b>Vehicle-treated females</b>           | <b>Fulvestrant-treated females</b>           |
| SWAT (Fig. 7H)                              | 0.4718 $\pm$ 0.013                       | 0.27 $\pm$ 0.024 ***                         |
| <b><math>\beta</math>3 agonist-treated:</b> | <b>ER<math>\alpha</math>WT females</b>   | <b>ER<math>\alpha</math>KO females</b>       |
| SWAT (Fig. 7J)                              | 0.488 $\pm$ 0.0134                       | 0.377 $\pm$ 0.0261 **                        |

194  
195 Microscopic photos of H&E histological sections were analyzed using ImageJ and the MRI  
196 Adipocytes Tools plugin. The fraction of area covered by large lipid droplets was defined as the  
197 unilocularity index (further details in Materials & Methods). The values indicate average  
198 unilocularity indices per experimental group  $\pm$  S.E.M, n=20-40 random photos per experimental  
199 group. Statistical significance assessed by two-tailed student's t-test, \*  $p < 10^{-2}$ , \*\*  $p < 10^{-3}$ , \*\*\*  $p$   
200  $< 10^{-6}$ , <sup>NS</sup> – not significant.

201
